# Supplementary material
Source: Springer Nature journal article supplement (https://www.springermedizin.de/resource/supplementary/12890_2012_355_MOESM1_ESM.pdf/9505034)
Supplement: MOESM1 [file 9505034]

January 2008 to January 2010  
53 patients referred to ICU for AE-COPD.

7 patients:  
Improvement with only NIV

46 patients intubated

21 patients excluded:  
- n= 9: restrictive pulmonary disorder.  
- n= 12: COPD diagnosis not proved

**25 COPD patients intubated for AE-COPD**
